# Supplementary material for: In vivo phage display screening for tumor vascular targets in glioblastoma identifies a llama nanobody against dynactin-1-p150Glued
Source: PubMed Central journal article supplement (PMC5342104; doi:10.18632/oncotarget.12261), 2016-09-26
Supplement: oncotarget-07-71594-s001.pdf [file oncotarget-07-71594-s001.pdf]

## ***In vivo* phage display screening for tumor vascular targets in glioblastoma identifies a llama nanobody against dynactin-1-p150<sup>Glued</sup>**

### Supplementary Materials

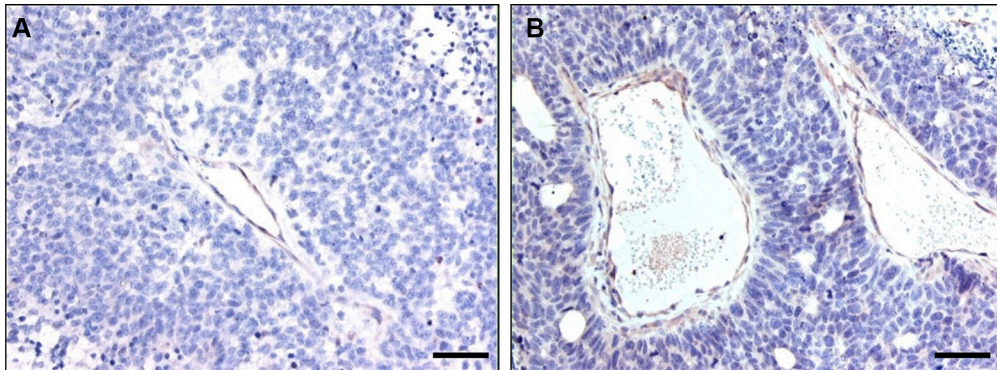

**Supplementary Figure S1: C-C7 recognizes tumor vessels in colon carcinoma xenografts.** Immunohistochemical analysis shows that C-C7 recognizes vasculature in subcutaneous colorectal cancer xenografts C26 (A) and C38 (B). Bars correspond to 50  $\mu$ m.
